# Supplementary material for: Transcriptome Profiling in the Hippocampi of Mice with Experimental Autoimmune Encephalomyelitis
Source: MDPI journal article supplement (doi:10.3390/ijms232314829), 2022-11-27
Supplement: s1 [file s1]

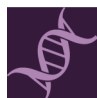

Supplementary Figures

# Transcriptome Profiling in the Hippocampi of Mice with Experimental Autoimmune Encephalomyelitis

Poornima D. E. Weerasinghe-Mudiyanselage <sup>1,†</sup>, Sohi Kang <sup>1,†</sup>, Joong-Sun Kim <sup>1</sup>, Sung-Ho Kim <sup>1</sup>, Hongbing Wang <sup>2</sup>, Taekyun Shin <sup>3</sup>, Changjong Moon <sup>1,\*</sup>

<sup>1</sup> Department of Veterinary Anatomy and Animal Behavior, College of Veterinary Medicine and BK21 FOUR Program, Chonnam National University, Gwangju 61186, Korea

<sup>2</sup> Department of Physiology and Neuroscience Program, Michigan State University, MI 48824, USA

<sup>3</sup> Department of Veterinary Anatomy, College of Veterinary Medicine and Veterinary Medical Research Institute, Jeju National University, Jeju 63243, South Korea

\* Correspondence: [moonc@chonnam.ac.kr](mailto:moonc@chonnam.ac.kr); Tel: +82-62-530-2838

† First two authors (P.D.E.W.-M. and S.K.) contributed equally to this work.

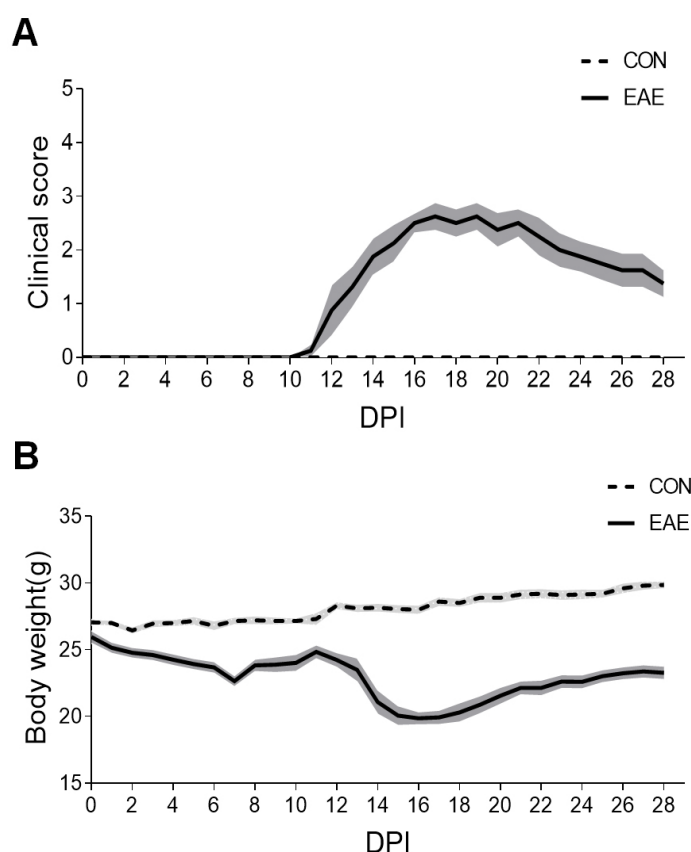

**Figure S1.** Clinical score (A) and body weight (B) of EAE-affected mice. Clinical symptoms were scored according to a 0–5 scale. Data are presented as the mean values of paralysis scores  $\pm$  SEM (n = 10/group). CON, control group; DPI, day post-immunization; EAE, EAE-affected group.

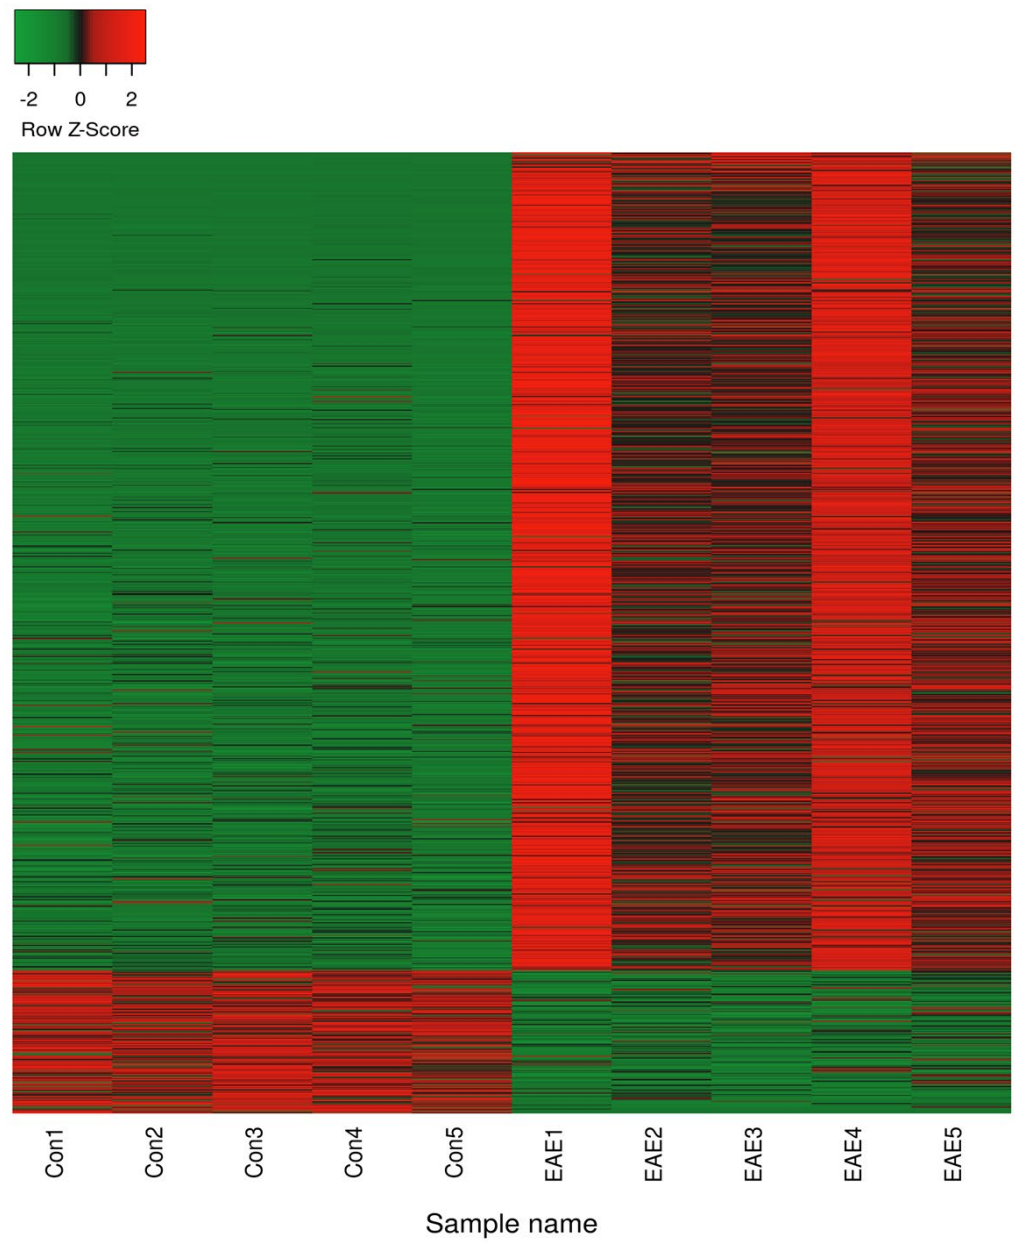

**Figure S2.** Heat map of differentially expressed genes (DEGs) in the hippocampi of CON vs. EAE-affected mice. Green and red indicate low and high expressions, respectively. Expression data are represented as Z-score for 1202 DEGs. CON, control group; EAE, EAE-affected group.

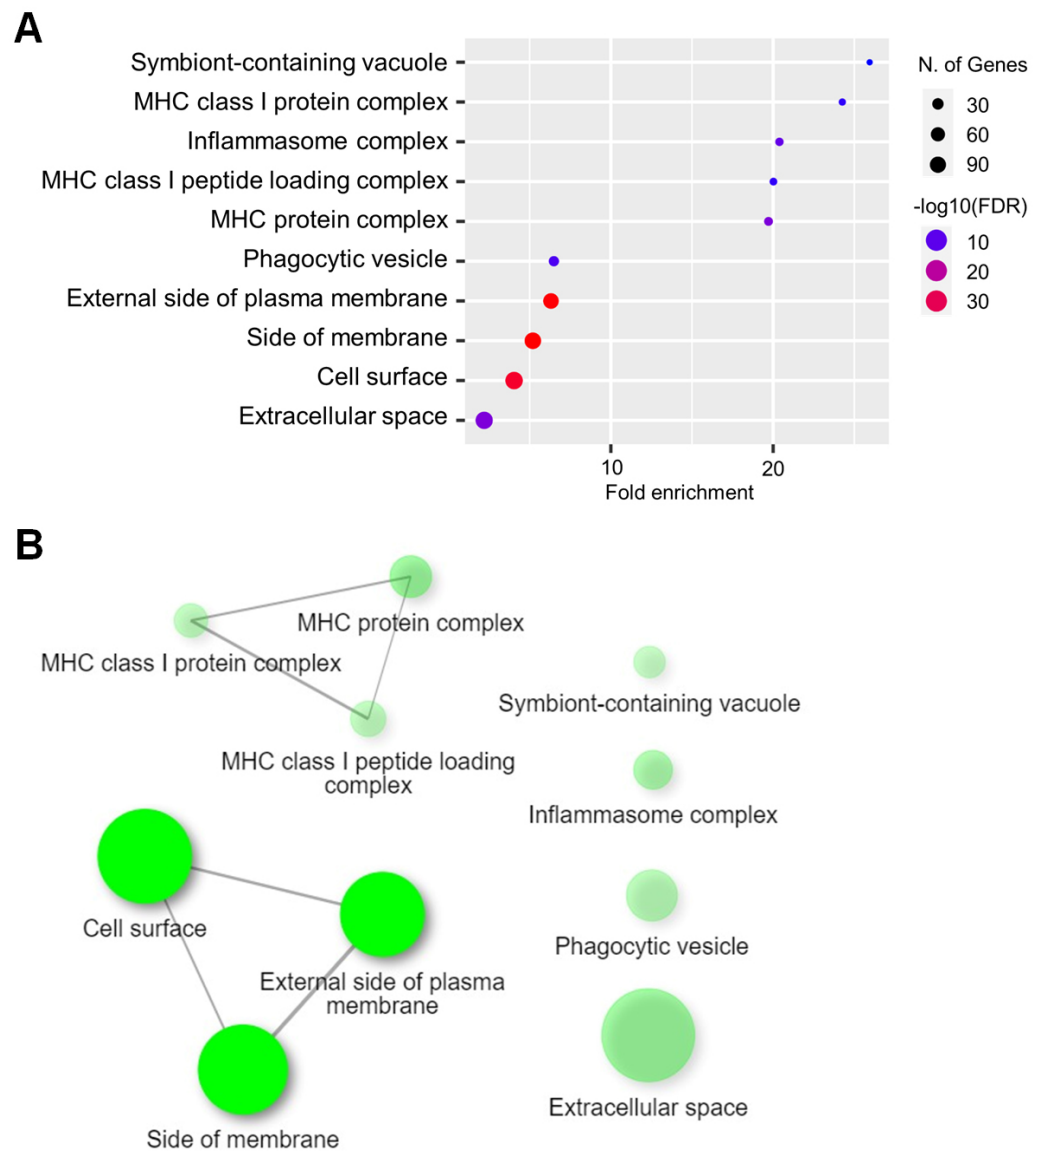

**Figure S3.** (A) Dot plot of enriched genes under GOCC (top ten) in EAE-affected hippocampi with > 1.5-fold change and  $p$ -value < 0.05. (B) Interactive plot showing the relationship between enriched pathways.

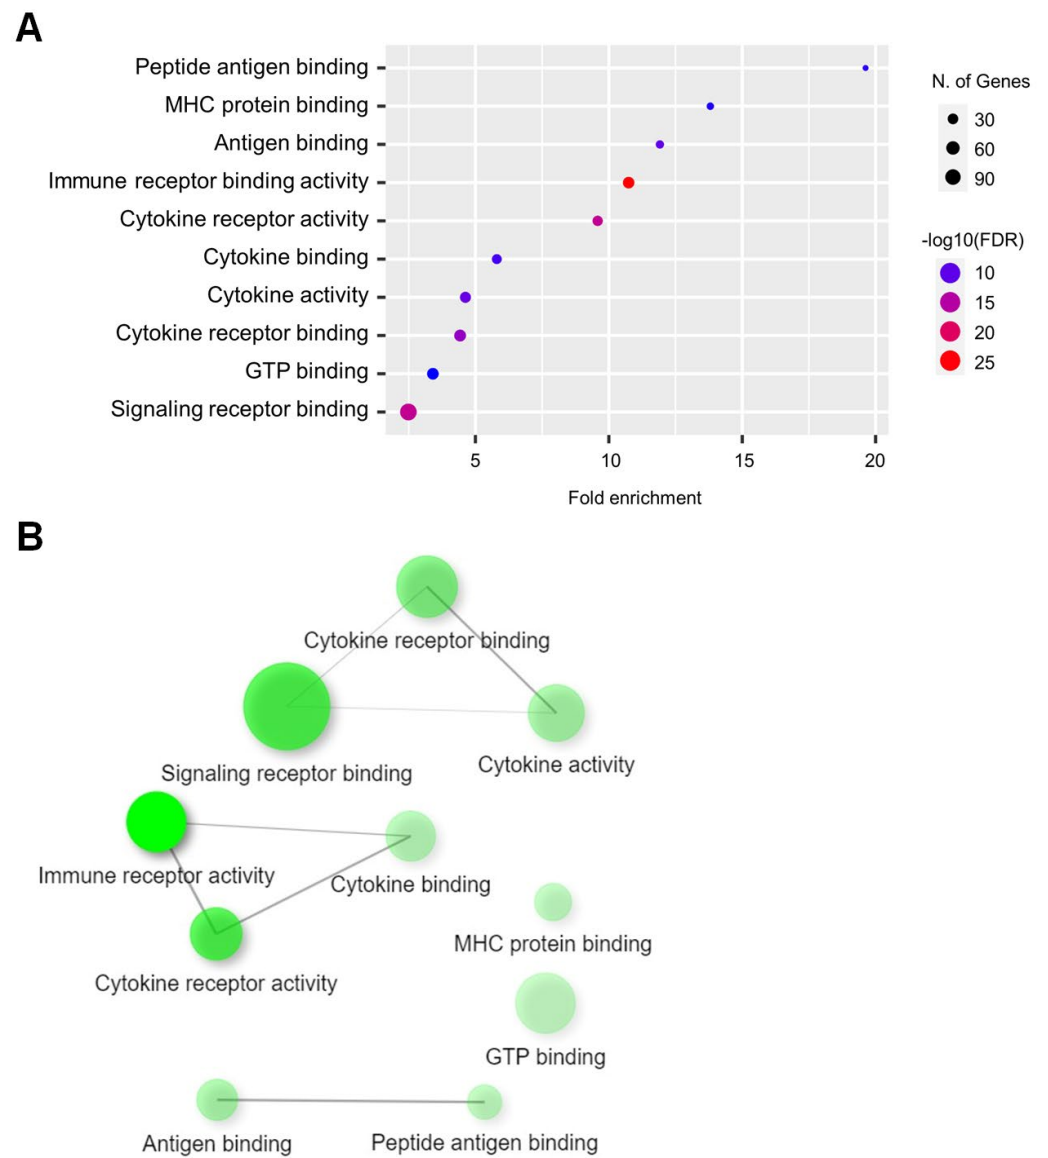

**Figure S4.** (A) Dot plot of enriched genes under GOMF (top ten) in EAE-affected hippocampi with  $> 1.5$ -fold change and  $p$ -value  $< 0.05$ . (B) Interactive plot showing the relationship between enriched pathways.

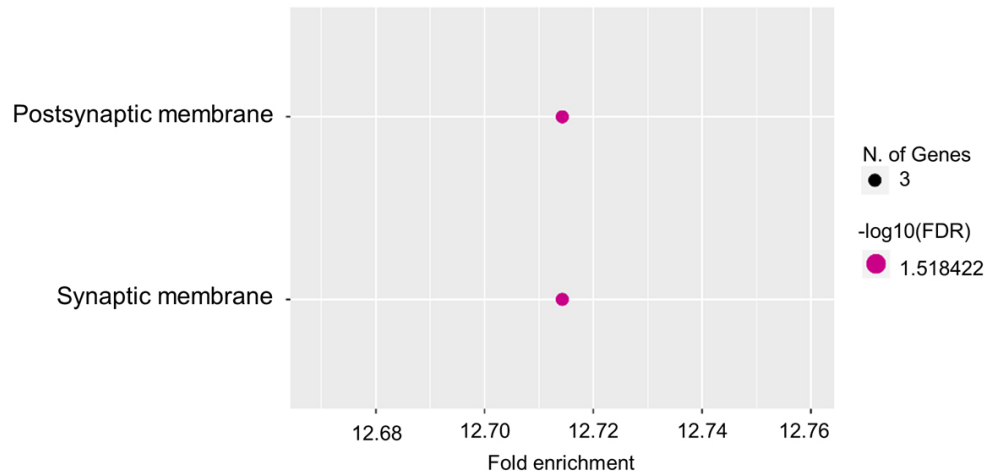

**Figure S5.** Dot plot of enriched genes under GOCC in EAE-affected hippocampi with  $> -1.5$ -fold change and  $p$ -value  $< 0.05$ .

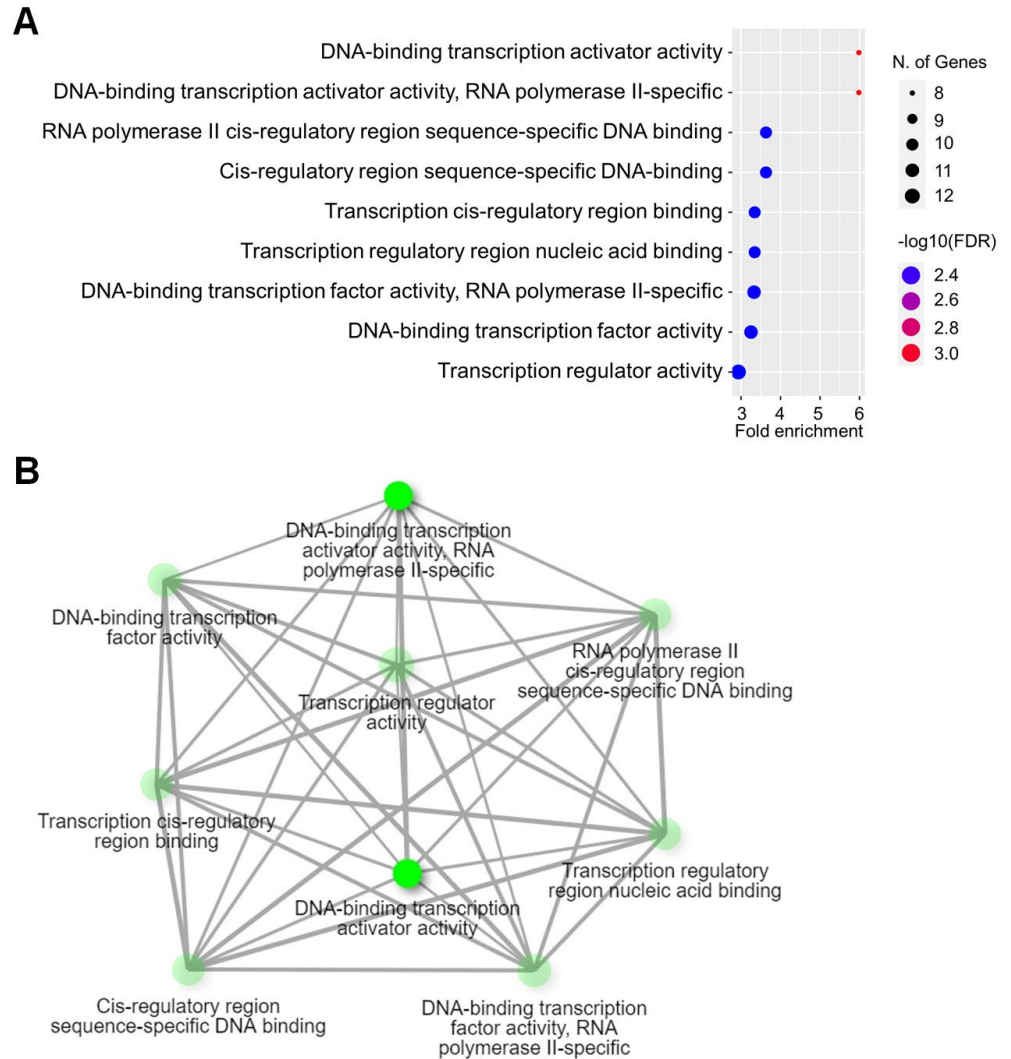

**Figure S6.** (A) Dot plot of enriched genes under GOMF in EAE-affected hippocampi with  $> -1.5$ -fold change and  $p$ -value  $< 0.05$ . (B) Interactive plot showing the relationship between enriched pathways.

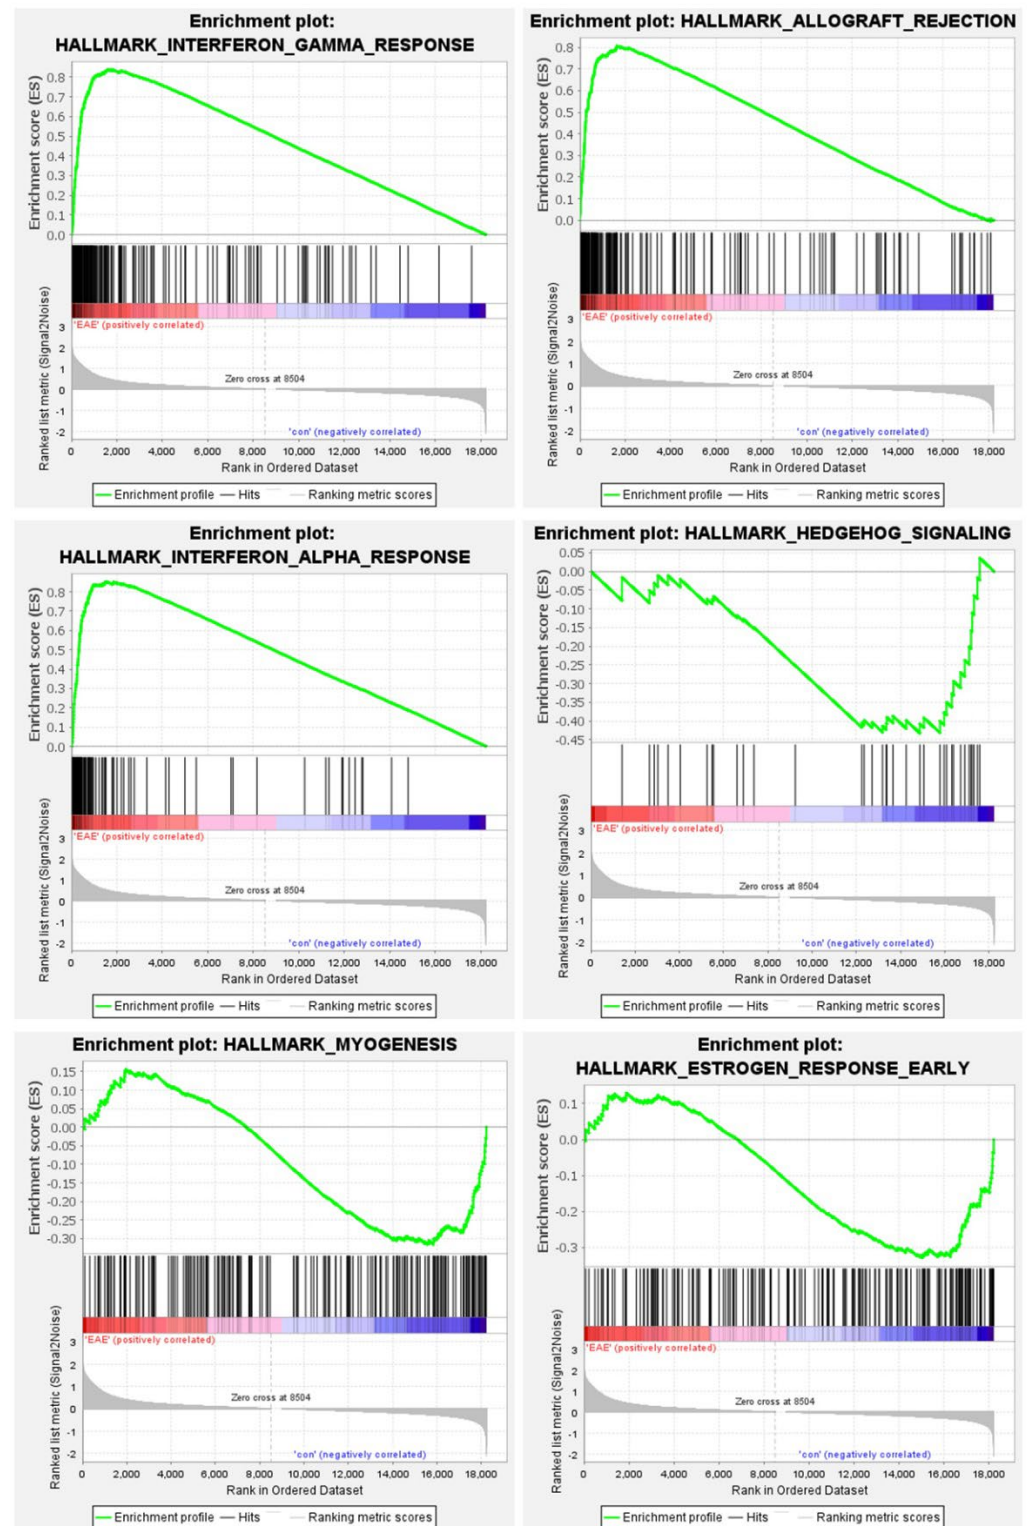

**Figure S7.** Representative enrichment plots for positively and negatively enriched hallmark gene sets in the hippocampi of mice with EAE.

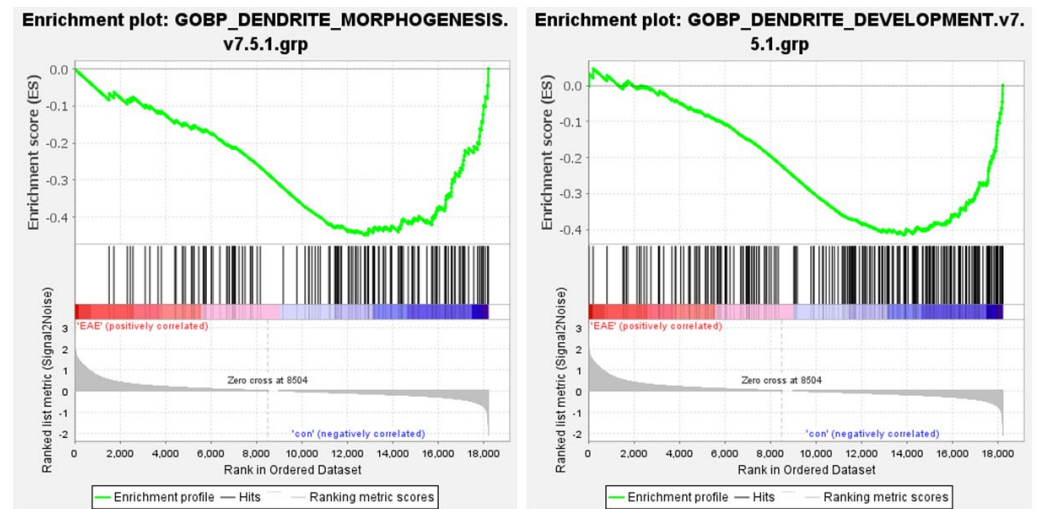

**Figure S8.** Representative enrichment plots for neuroplasticity-related curated gene sets in the hippocampi of mice with EAE.
