# Supplementary material for: Transcriptome Profiling in the Hippocampi of Mice with Experimental Autoimmune Encephalomyelitis
Source: MDPI journal article supplement (doi:10.3390/ijms232314829), 2022-11-27
Supplement: s1 [file s1]

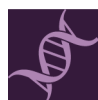

Supplementary Tables

# Transcriptome Profiling in the Hippocampi of Mice with Experimental Autoimmune Encephalomyelitis

Poornima D. E. Weerasinghe-Mudiyanselage <sup>1,†</sup>, Sohi Kang <sup>1,†</sup>, Joong-Sun Kim <sup>1</sup>, Sung-Ho Kim <sup>1</sup>, Hongbing Wang <sup>2</sup>, Taekyun Shin <sup>3</sup>, Changjong Moon <sup>1,\*</sup>

<sup>1</sup> Department of Veterinary Anatomy and Animal Behavior, College of Veterinary Medicine and BK21 FOUR Program, Chonnam National University, Gwangju 61186, Korea

<sup>2</sup> Department of Physiology and Neuroscience Program, Michigan State University, MI 48824, USA

<sup>3</sup> Department of Veterinary Anatomy, College of Veterinary Medicine and Veterinary Medical Research Institute, Jeju National University, Jeju 63243, South Korea

\* Correspondence: [moonc@chonnam.ac.kr](mailto:moonc@chonnam.ac.kr); Tel: +82-62-530-2838

† First two authors (P.D.E.W.-M. and S.K.) contributed equally to this work.

**Table S1.** Gene ontology analysis of upregulated genes in the hippocampi of EAE-induced mice under GOBP, GOCC, and GOMF.

| Pathway                                     | Fold Enrichment | Enrichment FDR | nGenes | Pathway Genes |
|---------------------------------------------|-----------------|----------------|--------|---------------|
| <b>GOBP</b>                                 |                 |                |        |               |
| Regulation of immune response               | 1.078943571     | 0.001373061    | 168    | 169           |
| Regulation of response to external stimulus | 1.077722432     | 0.012098849    | 141    | 142           |
| Leukocyte activation                        | 1.072048481     | 0.013115531    | 161    | 163           |
| Innate immune response                      | 1.071966275     | 0.013115531    | 160    | 162           |
| Regulation of immune system process         | 1.071510119     | 0.000269318    | 232    | 235           |
| Immune response                             | 1.070797184     | 3.07E-06       | 294    | 298           |
| Defense response to other organism          | 1.069085366     | 0.004495074    | 197    | 200           |
| Defense response                            | 1.06504065      | 0.000386969    | 262    | 267           |
| Positive regulation of response to stimulus | 1.064290789     | 0.012098849    | 202    | 206           |
| Immune system process                       | 1.061577013     | 3.07E-06       | 357    | 365           |
| <b>GOCC</b>                                 |                 |                |        |               |
| Symbiont-containing vacuole                 | 25.947663       | 2.08E-08       | 7      | 9             |
| MHC class I protein complex                 | 24.262749       | 4.58E-09       | 8      | 11            |
| Inflammasome complex                        | 20.387449       | 3.07E-11       | 11     | 18            |
| MHC class I peptide loading complex         | 20.016768       | 4.27E-09       | 9      | 15            |
| MHC protein complex                         | 19.713484       | 4.72E-13       | 13     | 22            |
| Phagocytic vesicle                          | 6.4869157       | 4.96E-10       | 21     | 108           |
| External side of plasma membrane            | 6.309462        | 1.49E-38       | 80     | 423           |
| Side of membrane                            | 5.1907341       | 8.03E-39       | 96     | 617           |
| Cell surface                                | 4.0350577       | 1.62E-35       | 112    | 926           |
| Extracellular space                         | 2.1932326       | 4.34E-13       | 109    | 1658          |
| <b>GOMF</b>                                 |                 |                |        |               |
| Peptide antigen binding                     | 19.624283       | 9.20E-10       | 10     | 17            |
| MHC protein binding                         | 13.804668       | 1.44E-09       | 12     | 29            |
| Antigen binding                             | 11.914743       | 7.86E-11       | 15     | 42            |
| Immune receptor activity                    | 10.743463       | 5.06E-26       | 38     | 118           |
| Cytokine receptor activity                  | 9.5824955       | 5.10E-17       | 27     | 94            |
| Cytokine binding                            | 5.8019618       | 3.88E-10       | 24     | 138           |
| Cytokine activity                           | 4.6257238       | 3.86E-11       | 33     | 238           |
| Cytokine receptor binding                   | 4.4265777       | 2.70E-13       | 41     | 309           |
| GTP binding                                 | 3.4059946       | 2.22E-09       | 39     | 382           |
| Signaling receptor binding                  | 2.4876587       | 5.10E-17       | 112    | 1502          |

**Abbreviations:** GOBP, gene ontology biological process; GOCC, gene ontology cellular component; GOMF, gene ontology molecular function

**Table S2.** Gene ontology analysis of downregulated genes in the hippocampi of EAE-induced mice under GOBP, GOCC, and GOMF.

| Pathway                                                                  | Fold Enrichment | Enrichment FDR | nGenes | Pathway Genes |
|--------------------------------------------------------------------------|-----------------|----------------|--------|---------------|
| <b>GOBP</b>                                                              |                 |                |        |               |
| Learning                                                                 | 12.71428571     | 0.009452057    | 4      | 4             |
| Skeletal muscle cell differentiation                                     | 12.71428571     | 0.009452057    | 4      | 4             |
| Olefinic compound metabolic proc.                                        | 12.71428571     | 0.0427895      | 3      | 3             |
| Cellular hormone metabolic proc.                                         | 12.71428571     | 0.0427895      | 3      | 3             |
| Embryonic skeletal system development                                    | 12.71428571     | 0.0427895      | 3      | 3             |
| Skeletal muscle tissue development                                       | 8.476190476     | 0.0427895      | 4      | 6             |
| Learning or memory                                                       | 7.063492063     | 0.0427895      | 5      | 9             |
| Behavior                                                                 | 5.448979592     | 0.0427895      | 6      | 14            |
| Nervous system proc.                                                     | 3.632653061     | 0.009452057    | 12     | 42            |
| System proc.                                                             | 3.036247335     | 0.009452057    | 16     | 67            |
| <b>GOCC</b>                                                              |                 |                |        |               |
| Postsynaptic membrane                                                    | 12.71428571     | 0.030309434    | 3      | 3             |
| Synaptic membrane                                                        | 12.71428571     | 0.030309434    | 3      | 3             |
| <b>GOMF</b>                                                              |                 |                |        |               |
| DNA-binding transcription activator activity                             | 5.983193277     | 0.000842435    | 8      | 17            |
| DNA-binding transcription activator activity, RNA polymerase II-specific | 5.983193277     | 0.000842435    | 8      | 17            |
| RNA polymerase II cis-regulatory region sequence-specific DNA binding    | 3.632653061     | 0.004183115    | 10     | 35            |
| Cis-regulatory region sequence-specific DNA binding                      | 3.632653061     | 0.004183115    | 10     | 35            |
| Transcription cis-regulatory region binding                              | 3.345864662     | 0.004200387    | 10     | 38            |
| Transcription regulatory region nucleic acid binding                     | 3.345864662     | 0.004200387    | 10     | 38            |
| DNA-binding transcription factor activity, RNA polymerase II-specific    | 3.329931973     | 0.004183115    | 11     | 42            |
| DNA-binding transcription factor activity                                | 3.252491694     | 0.004183115    | 11     | 43            |
| Transcription regulator activity                                         | 3.4059946       | 2.22E-09       | 39     | 382           |
| Signaling receptor binding                                               | 2.4876587       | 5.10E-17       | 112    | 1502          |

**Abbreviations:** GOBP, gene ontology biological process; GOCC, gene ontology cellular component; GOMF, gene ontology molecular function
